# Supplementary material
Source: HighWire-hosted journal article supplement (https://www.jpn.ca/highwire/filestream/89635/field_highwire_adjunct_files/0/200159-a1.pdf)
Supplement: 200159-a1.pdf [file 200159-a1.pdf]

## SUPPLEMENTARY DATA

**Title:** Blood microbiota and metabolomic signature of major depression before and after antidepressant treatment: a prospective case-control study

**Authors:** Dragos Ciocan<sup>1,2,3</sup>, MD, PhD; Anne-Marie Cassard<sup>1,2</sup>, PhD; Laurent Becquemont<sup>2,4,5,6</sup>, MD; Céline Verstuyft<sup>2,4,5,6</sup>, MD; Cosmin Sebastian Voican<sup>1,2,3</sup>, MD, PhD; Khalil El Asmar<sup>2,5</sup>, PhD; Romain Colle<sup>2,5,7</sup>, MD, PhD; Denis David<sup>5,8</sup>, PhD; Séverine Trabado<sup>2,6,9</sup>, PhD; Bruno Feve<sup>10,11</sup>, MD; Philippe Chanson<sup>2,9,12</sup>, MD; Gabriel Perlemuter<sup>1,2,3\*</sup>, MD, PhD; and Emmanuelle Corruble<sup>2,5,7\*</sup>, MD.

|                                                 |    |
|-------------------------------------------------|----|
| <b>SUPPLEMENTAL METHODS AND MATERIALS</b> ..... | 2  |
| <b>REFERENCES</b> .....                         | 5  |
| <b>Supplementary Table 1</b> .....              | 6  |
| <b>Supplementary Table 2</b> .....              | 7  |
| <b>Supplementary Table 3</b> .....              | 8  |
| <b>Supplementary Table 4</b> .....              | 9  |
| <b>Supplementary Table 5</b> .....              | 10 |
| <b>Supplementary Table 6</b> .....              | 11 |
| <b>Supplementary Table 7</b> .....              | 12 |
| <b>Supplementary Table 8</b> .....              | 13 |
| <b>Supplementary Table 9</b> .....              | 14 |
| <b>Supplementary Table 10</b> .....             | 15 |
| <b>Supplementary Table 11</b> .....             | 16 |
| <b>Supplementary Figure 1</b> .....             | 17 |
| <b>Supplementary Figure 2</b> .....             | 18 |
| <b>Supplementary Figure 3</b> .....             | 19 |
| <b>Supplementary Figure 4</b> .....             | 20 |
| <b>Supplementary Figure 5</b> .....             | 21 |

## **SUPPLEMENTAL METHODS AND MATERIALS**

### ***Study population***

Standardized interviews documented the lifetime duration of MDD since the onset of the first MDE, the number of previous MDE, the lifetime duration of prior antidepressant treatment since the onset of MDD, and whether patients were antidepressant-free before inclusion (no antidepressant treatment for at least one year before inclusion). Medical records were also examined. If there were discrepancy between interviews and medical records, the latter were prioritized. The 17-item HAMD and the Clinical Global Impression (CGI) were rated at baseline, one month, three months and six months after initiation of current antidepressant treatment.

### ***Blood microbiota and metabolomics***

Microbiome composition was identified using the V3-V4 hypervariable regions of the 16S rDNA which were amplified and quantified by qPCR, sequenced with MiSeq technology (Vaiomer, Labège, France). Using EDTA tubes, 30 mL of blood samples were obtained between 8:00 and 10:00 a.m. after an overnight fast. Blood was afterwards centrifuged at 4°C immediately after sampling during 10 minutes at 2000 g. Plasma was immediately aliquoted (using a Bionex NX Beckman Coulter pipetting robot that limits cross and airway contaminations) into separate polypropylene tubes that were immediately stored at -80°C until analysis.

Bacterial DNA was extracted from 300 µL plasma from fasting specimens collected in the morning, as previously described (1,2). The concentration of 16S rRNA gene copies normalized to 1 mL of plasma in each sample was determined by real-time qPCR using primers EUBF 50-TCCTACGGGAGGCAGCAGT-30 and EUBR 50-GGACTACCAGGGTATCTAATCCTGTT-30 (3). As many reagents required in the qPCR and sequencing pipeline contain bacterial DNA which can be misinterpreted as present in the samples, numerous combinations of reagents were tested to minimize bacterial contaminants and adapted the protocol to increase the yield of amplification of the bacterial DNA present in the blood. Furthermore, numerous controls were performed both in vitro and in silico to ensure the absence of artefacts (such as bacterial DNA contaminants from reagents or nonspecific amplification of eukaryotic DNA) as previously described (2)). The V3-V4 hypervariable regions of the 16S rDNA were amplified and quantified by qPCR, sequenced with MiSeq technology (Vaiomer, Labège, France).

The sequences were processed using the quantitative insights into microbial ecology (QIIME v1.9.0) pipeline, using its default parameters (4). Sequences were then clustered into operational taxonomic units (OTUs) displaying at least 97.0% sequence similarity, by a closed reference-based picking approach in UCLUST software applied to the Greengenes 13.8 database of bacterial 16S rDNA sequences (5). The mean number of quality-controlled reads was 25,525 ± 13,126 (mean ± SD) per sample.

After rarefaction at 8,000 reads per sample, the bacterial alpha diversity (species richness or number of taxa within a sample) was estimated based on the observed species, Faith's PD\_Whole\_Tree and Shannon's index. OTUs with a prevalence < 5% were removed from the analysis to decrease the probability of including OTUs generated by sequencing errors. The beta diversity (diversity of microbial communities between different categories) was assessed using weighted and unweighted UniFrac distances. The weighted Unifrac metric is weighted by the difference in the abundance of OTUs from each community, whereas unweighted UniFrac considers only the absence/presence of OTUs, providing different information. Both are phylogenetic beta diversity metrics. We investigated the OTUs not identified by QIIME further, using the Basic Local Alignment Search Tool (BLASTN program, vBLAST+ 2.6.0) from NCBI Blast, against the NCBI 16S Microbial database.

### ***Inferred metagenomics***

The functional composition of the intestinal metagenome was predicted using Phylogenetic Investigation of Communities by Reconstruction of Unobserved States (PICRUSt)(6) based on the Kyoto Encyclopedia of Genes and Genomes database. This is a computational approach that accurately predicts the abundance of gene families in the microbiota and thus provides information about the functional composition of the microbial community.

### ***Metabolomic assay***

Plasma samples were analyzed by a targeted metabolomics approach of combined direct flow injection and liquid chromatography MS/MS coupled to tandem mass spectrometry using the AbsoluteIDQ p180 kit (BIOCRATES Life Sciences AG, Innsbruck, Austria, <https://www.biocrates.com/products/research-products/absoluteidq-p180-kit>) according to the manufacturers' instructions. This metabolomic platform provides the simultaneous determination of 188 metabolites which includes 40 acylcarnitines, 42 aminoacids and biogenic amines, 90 glycerophospholipids (not included in this analysis), 15 sphingolipids (not included in this analysis), and sum of hexoses. Reported concentrations were within the quantification range validated for each metabolite. Concentrations of all metabolites were reported as  $\mu\text{mol/L}$ . This targeted metabolomics method has been validated in six testing laboratories to have a median inter-laboratory coefficient of variation of 7.6%, with 85% of metabolites with a median inter-laboratory variation of <20% (7).

### ***Statistical analysis***

The results are expressed as means  $\pm$  SEM. Alpha diversity comparisons were performed with nonparametric Student's t-tests and Monte Carlo permutations in QIIME. Individual comparisons were performed at all the levels of classification or taxonomic rank (phylum, class, order, family and genus). Taxa were compared using Mann–Whitney U-tests and the ANOSIM test with 999 permutations was used to compare distance matrices (weighted and unweighted UniFrac) in QIIME. Homogeneity between groups was tested using betadisper function from the vegan

Copyright © 2021 The Author(s) or their employer(s).

To receive this resource in an accessible format, please contact us at [cmajgroup@cmaj.ca](mailto:cmajgroup@cmaj.ca).

*Online appendices are unedited and posted as supplied by the authors.*

package in R. The Benjamini–Hochberg false discovery rate (FDR) correction was used to correct for multiple hypothesis testing, when applicable.

Linear discriminative analysis (LDA) effect size (LEfSe) analysis was performed to identify the taxa displaying the largest differences in abundance in the microbiota between groups. Briefly it consists of a Kruskal-Wallis test that analyzes whether the values in different classes are differentially distributed and a pairwise Wilcoxon test that assesses whether all pairwise comparisons between subclasses within different classes significantly agree with the class level trend. Finally, the resulting subset of vectors is used to build a Linear Discriminant Analysis model, from which the relative difference among classes is used to rank the features according to the effect size with which they differentiate classes. The final output thus consists of a list of features that are discriminative with respect to the classes, consistent with the subclass grouping within classes, and ranked according to the effect size with which they differentiate classes(8). Only taxa with an LDA score >2 and a significance of  $\alpha < 0.05$ , as determined in Wilcoxon signed-rank tests, are reported. The size of the circles in the cladogram plot is proportional to bacterial abundance. LEfSe, and Picrust were accessed online (<http://huttenhower.sph.harvard.edu/galaxy/>).

The remaining comparisons were performed with R software v2.14.1 or GraphPad v7.01 (Graphpad Prism, Graphpad Software Inc, La Jolla, California, USA). Unpaired and paired t-tests or Mann–Whitney U-tests were used to compare continuous data between groups, as appropriate. Chi2 or Fisher's exact tests were used to compare discrete parameters between groups. Spearman correlations with FDR correction for multiple comparisons were performed between the relative abundance of taxa and clinical parameters. A Firth model analysis(9) using logistf package (version 1.21) was used to identify the taxa and metabolites that were independently associated to response to treatment. Adjustment was done for sex, age, BMI, diabetes, smoking, history of major depressive episodes and suicide attempt and HDRS at baseline. A p-value < 0.05 was considered to be statistically significant.

All the statistical analysis and pathway annotations for the metabolites were carried out using MetaboAnalyst web tool ([www.metaboanalyst.ca](http://www.metaboanalyst.ca)). Data was normalized using log transformation and Pareto-scaling(10).

**Appendix 1** to Ciocan D, Cassard AM, Becquemont L et al. Blood microbiota and metabolomic signature of major depression before and after antidepressant treatment: a prospective case-control study. *J Psychiatry Neurosci* 2021. doi: 10.1503/jpn.200159

Copyright © 2021 The Author(s) or their employer(s).

To receive this resource in an accessible format, please contact us at [cmajgroup@cmaj.ca](mailto:cmajgroup@cmaj.ca).

*Online appendices are unedited and posted as supplied by the authors.*

## REFERENCES

1. Lelouvier B, Servant F, Païssé S, Brunet A-C, Benyahya S, Serino M, et al. Changes in blood microbiota profiles associated with liver fibrosis in obese patients: A pilot analysis. *Hepatology*. 2016;64(6):2015–27.
2. Païssé S, Valle C, Servant F, Courtney M, Burcelin R, Amar J, et al. Comprehensive description of blood microbiome from healthy donors assessed by 16S targeted metagenomic sequencing. *Transfusion*. 2016;56(5):1138–47.
3. Nadkarni MA, Martin FE, Jacques NA, Hunter N. Determination of bacterial load by real-time PCR using a broad-range (universal) probe and primers set. *Microbiology (Reading, Engl)*. 2002 Jan;148(Pt 1):257–66.
4. Caporaso JG, Kuczynski J, Stombaugh J, Bittinger K, Bushman FD, Costello EK, et al. QIIME allows analysis of high-throughput community sequencing data. *Nat Methods*. 2010 May;7(5):335–6.
5. DeSantis TZ, Hugenholtz P, Larsen N, Rojas M, Brodie EL, Keller K, et al. Greengenes, a chimera-checked 16S rRNA gene database and workbench compatible with ARB. *Appl Environ Microbiol*. 2006 Jul;72(7):5069–72.
6. Langille MGI, Zaneveld J, Caporaso JG, McDonald D, Knights D, Reyes JA, et al. Predictive functional profiling of microbial communities using 16S rRNA marker gene sequences. *Nat Biotechnol*. 2013 Sep;31(9):814–21.
7. Siskos AP, Jain P, Römisch-Margl W, Bennett M, Achaintre D, Asad Y, et al. Interlaboratory Reproducibility of a Targeted Metabolomics Platform for Analysis of Human Serum and Plasma. *Anal Chem*. 2017 03;89(1):656–65.
8. Segata N, Izard J, Waldron L, Gevers D, Miropolsky L, Garrett WS, et al. Metagenomic biomarker discovery and explanation. *Genome Biol*. 2011 Jun 24;12(6):R60.
9. Firth D. Bias reduction of maximum likelihood estimates. *Biometrika*. 1993 Mar 1;80(1):27–38.
10. Xia J, Wishart DS. Using MetaboAnalyst 3.0 for Comprehensive Metabolomics Data Analysis. *Curr Protoc Bioinformatics*. 2016 Sep 7;55:14.10.1-14.10.91.

Copyright © 2021 The Author(s) or their employer(s).

To receive this resource in an accessible format, please contact us at [cmajgroup@cmaj.ca](mailto:cmajgroup@cmaj.ca).

*Online appendices are unedited and posted as supplied by the authors.*

**Supplementary Table 1.** Changes in the blood microbiome profile of depressed patients (MDE) and matched healthy controls (HC) using LDA Effective Size (LEfSe).

| Phyla            | Class               | Ordre            | Family              | Genus            | Increased in    | LDA             | p     |       |
|------------------|---------------------|------------------|---------------------|------------------|-----------------|-----------------|-------|-------|
| Actinobacteria   | Acidimicrobiia      | Acidimicrobiales | Actinomycetaceae    | Actinomyces      | HC              | 2,32            | 0,043 |       |
|                  |                     |                  |                     |                  | HC              | 2,33            | 0,043 |       |
|                  |                     |                  |                     |                  | HC              | 2,92            | 0,009 |       |
|                  | Actinobacteria      | Actinomycetales  | Micrococcaceae      | Kocuria          | HC              | 2,91            | 0,017 |       |
|                  |                     |                  |                     |                  | HC              | 2,47            | 0,033 |       |
|                  |                     |                  |                     |                  | MDE             | 2,24            | 0,029 |       |
|                  |                     | Acidimicrobiales |                     |                  | HC              | 2,30            | 0,043 |       |
| Bacteroidetes    | Flavobacteriia      | Flavobacteriales | Flavobacteriaceae   | HC               | 2,38            | 0,031           |       |       |
|                  |                     |                  | Weeksellaceae       | Flavobacterium   | HC              | 2,30            | 0,043 |       |
|                  |                     |                  |                     | Thryseobacterium | MDE             | 3,15            | 0,033 |       |
|                  |                     |                  |                     |                  |                 | MDE             | 3,09  | 0,009 |
| Firmicutes       | Bacilli             | Lactobacillales  | Enterococcaceae     | HC               | 2,38            | 0,043           |       |       |
|                  |                     |                  | Enterococcus        | HC               | 2,35            | 0,043           |       |       |
|                  | Clostridia          | Clostridiales    | Tissierellaceae     | Parvimonas       | MDE             | 2,50            | 0,023 |       |
| Fusobacteria     | Fusobacteriia       | Fusobacteriales  | Fusobacteriaceae    | Fusobacterium    | HC              | 3,20            | 0,032 |       |
|                  |                     |                  |                     |                  | HC              | 3,18            | 0,032 |       |
|                  |                     |                  |                     |                  | HC              | 3,18            | 0,032 |       |
|                  |                     |                  |                     |                  | HC              | 3,18            | 0,002 |       |
|                  |                     |                  |                     |                  | HC              | 3,19            | 0,002 |       |
| Proteobacteria   | Alphaproteobacteria | Rhodospirillales | Rhodospirillaceae   |                  | HC              | 2,75            | 0,049 |       |
|                  |                     | Rhizobiales      | Methylobacteriaceae |                  | MDE             | 2,80            | 0,023 |       |
|                  |                     |                  |                     |                  | MDE             | 2,22            | 0,023 |       |
|                  |                     | Rhodocyclales    | Rhodocyclaceae      |                  | MDE             | 2,22            | 0,023 |       |
|                  |                     |                  | Comamonadaceae      | Curvibacter      | HC              | 2,48            | 0,027 |       |
|                  | Betaproteobacteria  | Burkholderiales  | Oxalobacteraceae    |                  | HC              | 2,85            | 0,027 |       |
|                  |                     |                  | Comamonadaceae      | Tepidimonas      | HC              | 2,14            | 0,032 |       |
|                  |                     |                  | Oxalobacteraceae    | anthinobacterium | MDE             | 2,92            | 0,014 |       |
|                  |                     |                  | Neisseriales        | Neisseriaceae    | Neisseria       | HC              | 2,96  | 0,007 |
|                  |                     |                  | Gammaproteobacteria | Pasteurellales   | Pasteurellaceae | Aggregatibacter | HC    | 3,07  |
| Saccharibacteria | TM7_3               | o._              | f._                 | g._              | HC              | 2,37            | 0,015 |       |
|                  |                     |                  |                     |                  | HC              | 2,29            | 0,015 |       |
|                  |                     |                  |                     |                  | HC              | 2,19            | 0,028 |       |
|                  |                     |                  |                     |                  | HC              | 2,21            | 0,028 |       |
|                  |                     |                  |                     |                  | HC              | 2,33            | 0,028 |       |

**Appendix 1** to Ciocan D, Cassard AM, Becquemont L et al. Blood microbiota and metabolomic signature of major depression before and after antidepressant treatment: a prospective case-control study. *J Psychiatry Neurosci* 2021. doi: 10.1503/jpn.200159

Copyright © 2021 The Author(s) or their employer(s).

To receive this resource in an accessible format, please contact us at [cmajgroup@cmaj.ca](mailto:cmajgroup@cmaj.ca).

*Online appendices are unedited and posted as supplied by the authors.*

**Supplementary Table 2:** Pathway Analysis based on metabolomic analysis in patients with major depression as compared to healthy controls.

| Pathway Name                                | Match Status | p      | FDR    | Impact  |
|---------------------------------------------|--------------|--------|--------|---------|
| Arginine and proline metabolism             | 12/77        | <0.001 | <0.001 | 0.57301 |
| Tryptophan metabolism                       | 3/79         | <0.001 | <0.001 | 0.20083 |
| Taurine and hypotaurine metabolism          | 2/20         | <0.001 | <0.001 | 0.36331 |
| Primary bile acid biosynthesis              | 2/47         | <0.001 | <0.001 | 0.01644 |
| Biotin metabolism                           | 1/11         | <0.001 | <0.001 | 0.0     |
| Nitrogen metabolism                         | 10/39        | <0.001 | <0.001 | 0.0083  |
| Cysteine and methionine metabolism          | 4/56         | <0.001 | 0.003  | 0.05003 |
| Aminoacyl-tRNA biosynthesis                 | 19/75        | 0.001  | 0.006  | 0.22536 |
| Valine, leucine and isoleucine biosynthesis | 4/27         | 0.002  | 0.007  | 0.03975 |
| Glycine, serine and threonine metabolism    | 5/48         | 0.002  | 0.007  | 0.42039 |
| Sphingolipid metabolism                     | 1/25         | 0.002  | 0.007  | 0.0     |
| Sulfur metabolism                           | 1/18         | 0.002  | 0.007  | 0.0     |
| Valine, leucine and isoleucine degradation  | 3/40         | 0.003  | 0.009  | 0.02232 |
| Cyanoamino acid metabolism                  | 4/16         | 0.003  | 0.009  | 0.0     |
| Methane metabolism                          | 2/34         | 0.010  | 0.024  | 0.01751 |
| Pantothenate and CoA biosynthesis           | 2/27         | 0.016  | 0.036  | 0.0     |
| Nicotinate and nicotinamide metabolism      | 1/44         | 0.017  | 0.038  | 0.0     |
| beta-Alanine metabolism                     | 3/28         | 0.031  | 0.064  | 0.06625 |
| Lysine biosynthesis                         | 3/32         | 0.042  | 0.081  | 0.16762 |
| Histidine metabolism                        | 3/44         | 0.068  | 0.123  | 0.14039 |

Copyright © 2021 The Author(s) or their employer(s).

To receive this resource in an accessible format, please contact us at [cmajgroup@cmaj.ca](mailto:cmajgroup@cmaj.ca).

*Online appendices are unedited and posted as supplied by the authors.*

**Supplementary Table 3.** Changes in the blood microbiome profile of depressed patients, before (M0) and after (M3) antidepressant treatment, using LDA Effective Size (LEfSe).

| Phyla          | Class                 | Ordre             | Family           | Genus          | Increased in | LDA  | p     |
|----------------|-----------------------|-------------------|------------------|----------------|--------------|------|-------|
| Bacteroidetes  | Cytophagia            | Cytophagales      | Cytophagaceae    | Hymenobacter   | M0           | 2,97 | 0,004 |
|                |                       |                   |                  |                | M0           | 3,05 | 0,004 |
|                |                       |                   |                  |                | M0           | 2,87 | 0,004 |
|                |                       |                   |                  |                | M0           | 2,37 | 0,023 |
| Firmicutes     | Bacilli               | Bacillales        | Lactobacillaceae | Staphylococcus | M3           | 3,74 | 0,016 |
|                |                       |                   |                  |                | M3           | 3,57 | 0,027 |
|                |                       |                   |                  |                | M3           | 3,46 | 0,046 |
|                |                       |                   |                  |                | M3           | 3,48 | 0,031 |
|                | Clostridia            | Clostridiales     | Lactobacillaceae | Staphylococcus | M3           | 2,62 | 0,004 |
|                |                       |                   |                  |                | M3           | 2,65 | 0,007 |
|                |                       |                   |                  |                | M3           | 2,46 | 0,044 |
|                |                       |                   |                  |                | M0           | 3,13 | 0,049 |
| Proteobacteria | Betaproteobacteria    | Burkholderiales   | Xanthomonadaceae | Xanthomonas    | M0           | 3,12 | 0,044 |
|                |                       |                   |                  |                | M3           | 2,28 | 0,037 |
|                |                       |                   |                  |                | M3           | 2,30 | 0,037 |
|                |                       |                   |                  |                | M0           | 3,17 | 0,002 |
|                | Gammaproteobacteria   | Xanthomonadales   | Xanthomonadaceae | Xanthomonas    | M0           | 2,85 | 0,002 |
|                |                       |                   |                  |                | M0           | 2,95 | 0,002 |
|                |                       |                   |                  |                | M3           | 2,69 | 0,033 |
|                |                       |                   |                  |                | M0           | 3,04 | 0,036 |
|                | Epsilonproteobacteria | Campylobacterales | Moraxellaceae    | Enhydrobacter  | M3           | 3,02 | 0,016 |
|                |                       |                   |                  |                | M0           | 2,86 | 0,043 |



**Appendix 1** to Ciocan D, Cassard AM, Becquemont L et al. Blood microbiota and metabolomic signature of major depression before and after antidepressant treatment: a prospective case-control study. *J Psychiatry Neurosci* 2021. doi: 10.1503/jpn.200159

Copyright © 2021 The Author(s) or their employer(s).

To receive this resource in an accessible format, please contact us at [cmajgroup@cmaj.ca](mailto:cmajgroup@cmaj.ca).

*Online appendices are unedited and posted as supplied by the authors.*

**Supplementary Table 4:** Changes in the blood microbiome predicted metabolic pathways of depressed patients, before (M0) and after treatment (M3), using LDA Effective Size (LEfSe).

| Predicted metabolic pathways                             | Increased in | LDA  | p     |
|----------------------------------------------------------|--------------|------|-------|
| Glycosaminoglycan degradation                            | M3           | 2.00 | 0.04  |
| Glycosphingolipid biosynthesis_lacto and neolacto series | M0           | 2.32 | 0.006 |
| Penicillin and cephalosporin biosynthesis                | M0           | 2.02 | 0.04  |
| Carbon fixation pathways in prokaryotes                  | M3           | 2.44 | 0.02  |
| Pyruvate metabolism                                      | M3           | 2.53 | 0.03  |
| Arginine and proline metabolism                          | M0           | 2.52 | 0.02  |
| Cyanoaminoacid metabolism                                | M0           | 2.25 | 0.02  |

**Appendix 1** to Ciocan D, Cassard AM, Becquemont L et al. Blood microbiota and metabolomic signature of major depression before and after antidepressant treatment: a prospective case-control study. *J Psychiatry Neurosci* 2021. doi: 10.1503/jpn.200159

Copyright © 2021 The Author(s) or their employer(s).

To receive this resource in an accessible format, please contact us at [cmajgroup@cmaj.ca](mailto:cmajgroup@cmaj.ca).

*Online appendices are unedited and posted as supplied by the authors.*

**Supplementary Table 5:** Changes in the blood microbiome profile in depressed patients who respond to treatment, before and after treatment, using LDA Effective Size (LEfSe).

| Phyla          | Class               | Ordre            | Family           | Genus            | Increased in | LDA  | p     |
|----------------|---------------------|------------------|------------------|------------------|--------------|------|-------|
| Actinobacteria | Actinobacteria      | Actinomycetales  | Nocardiaceae     | Rhodococcus      | M0_REP       | 3,01 | 0,021 |
|                |                     | Actinomycetales  | Nocardiaceae     |                  | M0_REP       | 2,99 | 0,021 |
| Bacteroidetes  | Cytophagia          | Cytophagales     | Cytophagaceae    | Hymenobacter     | M0_REP       | 2,80 | 0,011 |
|                |                     |                  |                  |                  | M0_REP       | 2,87 | 0,011 |
|                | Flavobacteriia      | Flavobacteriales | Weeksellaceae    | Chryseobacterium | M0_REP       | 2,87 | 0,011 |
|                |                     |                  |                  |                  | M0_REP       | 2,23 | 0,041 |
|                |                     |                  |                  |                  | M0_REP       | 2,90 | 0,035 |
|                |                     |                  |                  |                  | M0_REP       | 3,40 | 0,030 |
| Firmicutes     | Clostridia          | Clostridiales    | Aerococcaceae    |                  | M0_REP       | 3,40 | 0,030 |
|                |                     |                  |                  |                  | M3_REP       | 2,34 | 0,011 |
| Proteobacteria | Betaproteobacteria  | Burkholderiales  | Oxalobacteraceae | g____            | M0_REP       | 3,44 | 0,039 |
|                |                     |                  |                  |                  | M0_REP       | 3,35 | 0,004 |
|                |                     |                  |                  |                  | M0_REP       | 3,41 | 0,003 |
|                |                     |                  |                  |                  | M0_REP       | 3,18 | 0,003 |
|                |                     |                  |                  |                  | M0_REP       | 3,14 | 0,004 |
|                |                     |                  |                  |                  | M0_REP       | 2,05 | 0,021 |
|                | Gammaproteobacteria | Pasteurellales   | Pasteurellaceae  | Aggregatibacter  | M0_REP       | 2,05 | 0,021 |
|                |                     |                  |                  |                  | M3_REP       | 3,09 | 0,028 |
|                |                     |                  |                  |                  | M3_REP       | 2,40 | 0,041 |
|                |                     |                  |                  |                  | M3_REP       | 2,40 | 0,041 |

Copyright © 2021 The Author(s) or their employer(s).

To receive this resource in an accessible format, please contact us at [cmajgroup@cmaj.ca](mailto:cmajgroup@cmaj.ca).

*Online appendices are unedited and posted as supplied by the authors.*

**Supplementary Table 6:** Changes in the blood microbiome profile in depressed patients who do not respond to treatment, before and after treatment, using LDA Effective Size (LEfSe).

| Phyla          | Class               | Ordre           | Family            | Genus          | Increased in | LDA  | p     |
|----------------|---------------------|-----------------|-------------------|----------------|--------------|------|-------|
| Actinobacteria | Rubrobacteria       |                 |                   |                | M3_nonREP    | 2,70 | 0,039 |
|                |                     | Rubrobacterales |                   |                | M3_nonREP    | 2,60 | 0,039 |
|                |                     |                 | Rubrobacteraceae  |                | M3_nonREP    | 2,80 | 0,039 |
|                |                     |                 |                   | Rubrobacter    | M3_nonREP    | 2,57 | 0,039 |
| Firmicutes     |                     |                 |                   |                | M3_nonREP    | 3,93 | 0,034 |
|                | Bacilli             |                 |                   |                | M3_nonREP    | 3,94 | 0,020 |
|                |                     | Bacillales      |                   |                | M3_nonREP    | 3,78 | 0,017 |
|                |                     |                 | Planococcaceae    | g__            | M3_nonREP    | 2,22 | 0,027 |
|                |                     |                 | Staphylococcaceae |                | M3_nonREP    | 3,73 | 0,006 |
|                |                     |                 |                   | Staphylococcus | M3_nonREP    | 3,73 | 0,006 |
|                |                     |                 | Carnobacteriaceae |                | M3_nonREP    | 3,03 | 0,010 |
|                |                     | Lactobacillales | Carnobacteriaceae | Granulicatella | M3_nonREP    | 3,03 | 0,010 |
|                | Clostridia          | Clostridiales   | Ruminococcaceae   |                | M3_nonREP    | 2,45 | 0,039 |
| Proteobacteria |                     |                 |                   |                | M0_nonREP    | 4,11 | 0,043 |
|                | Alphaproteobacteria |                 |                   |                | M0_nonREP    | 4,22 | 0,014 |
|                |                     | Rhizobiales     |                   |                | M0_nonREP    | 4,19 | 0,029 |
|                | Betaproteobacteria  | Neisseriales    | Neisseriaceae     | Neisseria      | M3_nonREP    | 2,82 | 0,037 |

Copyright © 2021 The Author(s) or their employer(s).

To receive this resource in an accessible format, please contact us at [cmajgroup@cmaj.ca](mailto:cmajgroup@cmaj.ca).

*Online appendices are unedited and posted as supplied by the authors.*

**Supplementary Table 7:** Changes in the blood microbiome predicted metabolic pathways in depressed patients who do not respond to treatment, before and after treatment, using LDA Effective Size (LEfSe).

| Predicted metabolic pathway                                     | Increased in | LDA  | p    |
|-----------------------------------------------------------------|--------------|------|------|
| D_Alanine metabolism                                            | M3_nonREP    | 2,33 | 0,01 |
| Glycolysis_Gluconeogenesis                                      | M3_nonREP    | 2,91 | 0,01 |
| Glycerolipid metabolism                                         | M3_nonREP    | 2,63 | 0,00 |
| Ubiquinone and other terpenoid_quinone biosynthesis             | M3_nonREP    | 2,47 | 0,04 |
| Vitamin B6 metabolism                                           | M3_nonREP    | 2,21 | 0,04 |
| beta_Alanine metabolism                                         | M0_nonREP    | 2,72 | 0,03 |
| Citratecycle_TCAcycle                                           | M3_nonREP    | 2,76 | 0,00 |
| Thiamine metabolism                                             | M3_nonREP    | 2,45 | 0,04 |
| Penicillin and cephalosporin biosynthesis                       | M0_nonREP    | 2,10 | 0,04 |
| Metabolism of xenobiotics by cytochrome P450                    | M0_nonREP    | 2,83 | 0,00 |
| Aminosugar and nucleotide sugar metabolism                      | M3_nonREP    | 3,03 | 0,01 |
| Lipoicacid metabolism                                           | M3_nonREP    | 2,23 | 0,01 |
| Stilbenoid_diarylheptanoid and gingerol biosynthesis            | M0_nonREP    | 2,30 | 0,01 |
| Pyrimidine metabolism                                           | M3_nonREP    | 3,15 | 0,02 |
| Carbonfixation pathways in prokaryotes                          | M3_nonREP    | 2,70 | 0,02 |
| Glutathione metabolism                                          | M0_nonREP    | 2,90 | 0,01 |
| Biosynthesis of vancomycin group antibiotics                    | M0_nonREP    | 2,14 | 0,05 |
| Pyruvate metabolism                                             | M3_nonREP    | 2,82 | 0,01 |
| Retinol metabolism                                              | M0_nonREP    | 2,14 | 0,05 |
| Photosynthesis                                                  | M3_nonREP    | 2,51 | 0,01 |
| Steroid hormone biosynthesis                                    | M0_nonREP    | 2,16 | 0,04 |
| Prenyltransferases                                              | M3_nonREP    | 2,40 | 0,03 |
| Cyanoaminoacid metabolism                                       | M0_nonREP    | 2,46 | 0,00 |
| Peptidoglycan biosynthesis                                      | M3_nonREP    | 2,84 | 0,03 |
| Lipid biosynthesis proteins                                     | M0_nonREP    | 2,57 | 0,02 |
| Nitrotoluene degradation                                        | M0_nonREP    | 2,44 | 0,04 |
| Terpenoid backbone biosynthesis                                 | M3_nonREP    | 2,56 | 0,01 |
| Xylene degradation                                              | M3_nonREP    | 2,13 | 0,04 |
| Arachidonicacid metabolism                                      | M0_nonREP    | 2,28 | 0,02 |
| Chloroalkane and chloroalkene degradation                       | M0_nonREP    | 2,67 | 0,03 |
| Fructose and mannose metabolism                                 | M3_nonREP    | 2,69 | 0,01 |
| Limonene and pinene degradation                                 | M0_nonREP    | 2,72 | 0,05 |
| D_Glutamine and D_glutamate metabolism                          | M3_nonREP    | 2,20 | 0,04 |
| Linoleicacid metabolism                                         | M0_nonREP    | 2,26 | 0,02 |
| Photosynthesis proteins                                         | M3_nonREP    | 2,45 | 0,02 |
| Phosphonate and phosphinate metabolism                          | M0_nonREP    | 2,01 | 0,03 |
| Galactose metabolism                                            | M3_nonREP    | 2,71 | 0,02 |
| Zeatinbiosynthesis                                              | M3_nonREP    | 2,39 | 0,02 |
| f_1_1_1_Trichloro_2_2_bis_4_chlorophenyl_ethane_DDT_degradation | M0_nonREP    | 2,39 | 0,03 |
| Riboflavin metabolism                                           | M3_nonREP    | 2,35 | 0,02 |
| Drug metabolism_cytochrome P450                                 | M0_nonREP    | 2,86 | 0,01 |
| One carbonpool by folate                                        | M3_nonREP    | 2,67 | 0,03 |

Copyright © 2021 The Author(s) or their employer(s).

To receive this resource in an accessible format, please contact us at [cmajgroup@cmaj.ca](mailto:cmajgroup@cmaj.ca).

*Online appendices are unedited and posted as supplied by the authors.*

**Supplementary Table 8:** Baseline changes in the blood microbiome predicted metabolic pathways in depressed patients, associated with treatment response, using LDA Effective Size (LEfSe).

| Predicted metabolic pathway                  | Increased in | LDA  | p    |
|----------------------------------------------|--------------|------|------|
| Valine_leucine and isoleucine degradation    | M0_nonREP    | 2,99 | 0,01 |
| Fattyacid metabolism                         | M0_nonREP    | 2,90 | 0,02 |
| Limonene and pinene degradation              | M0_nonREP    | 2,82 | 0,01 |
| Tryptophan metabolism                        | M0_nonREP    | 2,81 | 0,04 |
| Geraniol degradation                         | M0_nonREP    | 2,80 | 0,01 |
| Drug metabolism_cytochromeP450               | M0_nonREP    | 2,77 | 0,02 |
| Lysine degradation                           | M0_nonREP    | 2,75 | 0,01 |
| Metabolism of xenobiotics by cytochrome P450 | M0_nonREP    | 2,74 | 0,01 |
| beta_Alanine metabolism                      | M0_nonREP    | 2,72 | 0,02 |
| Chloroalkane and chloroalkene degradation    | M0_nonREP    | 2,68 | 0,01 |
| Naphthalene degradation                      | M0_nonREP    | 2,64 | 0,01 |
| Caprolactam degradation                      | M0_nonREP    | 2,63 | 0,02 |
| Bisphenol degradation                        | M0_nonREP    | 2,54 | 0,03 |
| Lipid biosynthesis proteins                  | M0_nonREP    | 2,45 | 0,04 |
| Linoleicacid metabolism                      | M0_nonREP    | 2,27 | 0,02 |
| Retinol metabolism                           | M0_nonREP    | 2,20 | 0,00 |
| D_Glutamine and D_glutamate metabolism       | M0_REP       | 2,15 | 0,01 |
| Betalain biosynthesis                        | M0_REP       | 2,18 | 0,01 |
| Xylene degradation                           | M0_REP       | 2,20 | 0,03 |
| Riboflavin metabolism                        | M0_REP       | 2,26 | 0,02 |
| Indolealkaloid biosynthesis                  | M0_REP       | 2,29 | 0,02 |
| Nicotinate and nicotinamide metabolism       | M0_REP       | 2,34 | 0,03 |
| Glycerophospholipid metabolism               | M0_REP       | 2,39 | 0,02 |
| Alanine_aspartate and glutamate metabolism   | M0_REP       | 2,53 | 0,03 |
| Pyruvate metabolism                          | M0_REP       | 2,56 | 0,04 |
| Purine metabolism                            | M0_REP       | 2,95 | 0,03 |
| Pyrimidine metabolism                        | M0_REP       | 3,09 | 0,04 |

**Appendix 1** to Ciocan D, Cassard AM, Becquemont L et al. Blood microbiota and metabolomic signature of major depression before and after antidepressant treatment: a prospective case-control study. *J Psychiatry Neurosci* 2021. doi: 10.1503/jpn.200159

Copyright © 2021 The Author(s) or their employer(s).

To receive this resource in an accessible format, please contact us at [cmajgroup@cmaj.ca](mailto:cmajgroup@cmaj.ca).

*Online appendices are unedited and posted as supplied by the authors.*

**Supplementary Table 9:** Baseline changes in the blood microbiome profile in depressed patients, associated with remission, using LDA Effective Size (LEfSe).

| Phyla          | Class               | Ordre            | Family            | Genus         | Increased in | LDA   | p     |  |  |  |
|----------------|---------------------|------------------|-------------------|---------------|--------------|-------|-------|--|--|--|
| Firmicutes     | Clostridia          | Clostridiales    | Clostridiaceae    | Clostridium   | M0_REM       | 3,65  | 0,014 |  |  |  |
|                |                     |                  |                   |               | M0_REM       | 3,65  | 0,014 |  |  |  |
|                |                     |                  |                   |               | M0_REM       | 2,90  | 0,035 |  |  |  |
|                |                     | Lactobacillales  | Lactobacillaceae  | Lactobacillus | M0_REM       | 2,94  | 0,035 |  |  |  |
|                | M0_nonREM           |                  |                   |               | 2,75         | 0,037 |       |  |  |  |
|                | Bacilli             |                  |                   |               | M0_nonREM    | 2,76  | 0,037 |  |  |  |
| Proteobacteria |                     | Sphingomonadales | Sphingomonadaceae | Sphingomonas  | M0_nonREM    | 4,10  | 0,026 |  |  |  |
|                |                     |                  |                   |               | M0_nonREM    | 2,92  | 0,018 |  |  |  |
|                |                     |                  |                   |               | M0_nonREM    | 3,01  | 0,004 |  |  |  |
|                |                     | Caulobacterales  | Caulobacteraceae  | Kaistobacter  | M0_nonREM    | 2,86  | 0,008 |  |  |  |
|                |                     |                  |                   |               | M0_nonREM    | 2,76  | 0,043 |  |  |  |
|                |                     |                  |                   |               | M0_nonREM    | 3,11  | 0,025 |  |  |  |
|                | Alphaproteobacteria | Burkholderiales  | Comamonadaceae    | Tenidimonas   | M0_nonREM    | 3,12  | 0,025 |  |  |  |
|                | Betaproteobacteria  |                  |                   |               | M0_REM       | 3,21  | 0,026 |  |  |  |
|                |                     |                  |                   |               |              |       |       |  |  |  |

Copyright © 2021 The Author(s) or their employer(s).

To receive this resource in an accessible format, please contact us at [cmajgroup@cmaj.ca](mailto:cmajgroup@cmaj.ca).

*Online appendices are unedited and posted as supplied by the authors.*

**Supplementary Table 10:** Baseline changes in the blood microbiome predicted metabolic pathways in depressed patients, associated with remission, using LDA Effective Size (LEfSe).

| Predicted metabolic pathway                           | Increased in | LDA  | p     |
|-------------------------------------------------------|--------------|------|-------|
| Bisphenol degradation                                 | M0_nonREM    | 2.58 | 0.04  |
| beta-Alanine metabolism                               | M0_nonREM    | 2.70 | 0.04  |
| Propanoate metabolism                                 | M0_nonREM    | 2.82 | 0.03  |
| Naphthalene degradation                               | M0_nonREM    | 2.58 | 0.04  |
| Metabolism of xenobiotics by cytochrome P450          | M0_nonREM    | 2.81 | 0.006 |
| Stilbenoid, diarylheptanoid and gingerol biosynthesis | M0_nonREM    | 2.42 | 0.03  |
| beta-Lactam resistance                                | M0_nonREM    | 2.11 | 0.03  |
| Pyrimidine metabolism                                 | M0_REM       | 3.14 | 0.04  |
| Aminobenzoate degradation                             | M0_nonREM    | 2.89 | 0.04  |
| Glutathione metabolism                                | M0_nonREM    | 2.81 | 0.02  |
| Fatty acid metabolism                                 | M0_nonREM    | 2.91 | 0.03  |
| D-Arginine and D-ornithine metabolism                 | M0_nonREM    | 2.37 | 0.03  |
| Retinol metabolism                                    | M0_nonREM    | 2.31 | 0.009 |
| Purine metabolism                                     | M0_REM       | 2.99 | 0.04  |
| Drug metabolism - other enzymes                       | M0_REM       | 2.45 | 0.04  |
| Xylene degradation                                    | M0_REM       | 2.31 | 0.04  |
| Valine, leucine and isoleucine degradation            | M0_nonREM    | 2.99 | 0.02  |
| Alanine, aspartate and glutamate metabolism           | M0_REM       | 2.67 | 0.02  |
| Chloroalkane and chloroalkene degradation             | M0_nonREM    | 2.70 | 0.009 |
| Limonene and pinene degradation                       | M0_nonREM    | 2.80 | 0.03  |
| Tryptophan metabolism                                 | M0_nonREM    | 2.86 | 0.04  |
| Phosphonate and phosphinate metabolism                | M0_nonREM    | 2.13 | 0.04  |
| Nicotinate and nicotinamide metabolism                | M0_REM       | 2.53 | 0.007 |
| Lysine degradation                                    | M0_nonREM    | 2.76 | 0.03  |
| Drug metabolism - cytochrome P450                     | M0_nonREM    | 2.85 | 0.007 |
| One-carbon pool by folate                             | M0_REM       | 2.64 | 0.04  |

Copyright © 2021 The Author(s) or their employer(s).

To receive this resource in an accessible format, please contact us at [cmajgroup@cmaj.ca](mailto:cmajgroup@cmaj.ca).

*Online appendices are unedited and posted as supplied by the authors.*

**Supplementary Table 11:** Variables independently associated with response to antidepressant treatment in depressed patients.

| Variables                                             | Coefficient  | 95 % Confidence Interval |              | Chisq       | P           |
|-------------------------------------------------------|--------------|--------------------------|--------------|-------------|-------------|
| Sex (female)                                          | -0.26        | -2.04                    | 1.36         | 0.10        | 0.75        |
| Age (years)                                           | 0.00         | -0.05                    | 0.06         | 0.00        | 0.96        |
| Baseline HDRS                                         | -4.35        | -9.40                    | 0.03         | 3.79        | 0.05        |
| MDE history                                           | 1.36         | -0.01                    | 3.04         | 3.76        | 0.05        |
| Suicide attempt history                               | 0.10         | -1.21                    | 1.46         | 0.02        | 0.88        |
| Diabetes (yes)                                        | 0.69         | -2.89                    | 4.11         | 0.17        | 0.68        |
| Baseline BMI                                          | -1.13        | -5.41                    | 2.80         | 0.32        | 0.57        |
| Smoking (yes)                                         | -0.87        | -2.51                    | 0.59         | 1.34        | 0.25        |
| Firmicutes                                            | 1.39         | -2.09                    | 5.20         | 0.61        | 0.44        |
| f_Intrasporangiaceae_Other<br>( <i>Tetrasphaera</i> ) | -5.42        | -57.53                   | 15.13        | 0.25        | 0.62        |
| <b>o_Rhizobiales_f_g (Bosea)</b>                      | <b>-6.86</b> | <b>-13.52</b>            | <b>-1.73</b> | <b>7.07</b> | <b>0.01</b> |
| <b>Tryptophan</b>                                     | <b>0.08</b>  | <b>0.01</b>              | <b>0.17</b>  | <b>5.55</b> | <b>0.02</b> |
| Octadecadienylcarnitine                               | -2.51        | -5.90                    | 0.28         | 3.06        | 0.08        |



## Supplementary fig 1

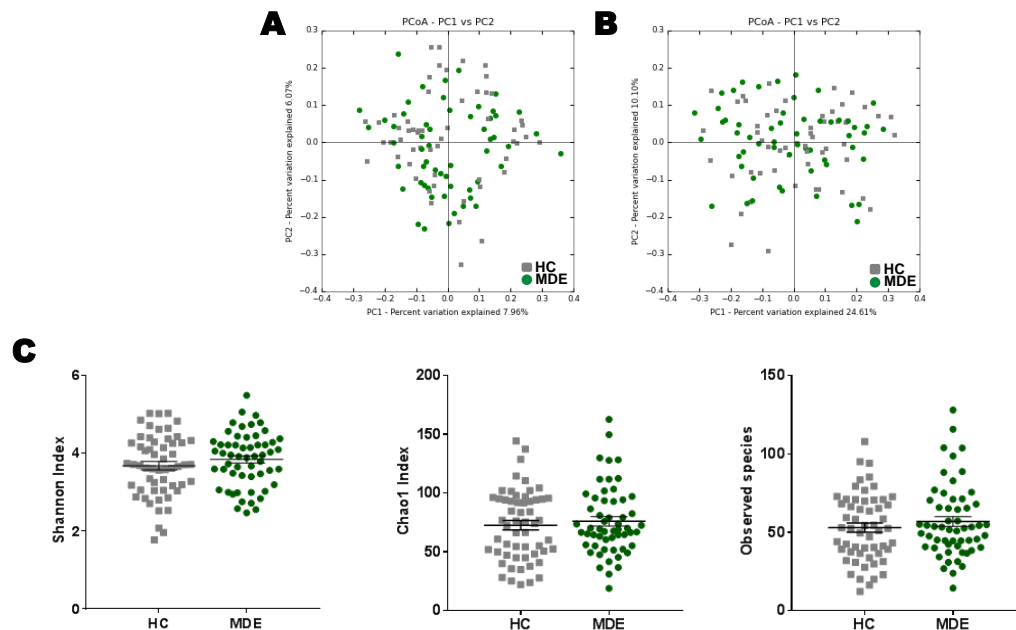

**Supplementary Figure 1. Inter- (beta) and intra- (alpha) individually diversity of blood microbiota in depressed patients (MDE, n=56) and matched healthy controls (HC, n=56).** (A) Unweighted distances and (B) weighted UniFrac distances showing a difference in the composition of the blood microbiota between MDE (green) patients and HC (blue) ( $p = 0.01$  for unweighted UniFrac distances, ANOSIM test). Each point represents a subject and the distance between points is proportional to the similarity of the blood microbiota. (C) Alpha diversity assessed by the Shannon Index ( $p=0.4$ ), Chao1 Index ( $p=0.7$ ) and Observed Species ( $p=0.5$ , unpaired Mann-Whitney test for all the alpha diversity comparisons).

Copyright © 2021 The Author(s) or their employer(s).

To receive this resource in an accessible format, please contact us at [cmajgroup@cmaj.ca](mailto:cmajgroup@cmaj.ca).

Online appendices are unedited and posted as supplied by the authors.

### Supplementary fig 2

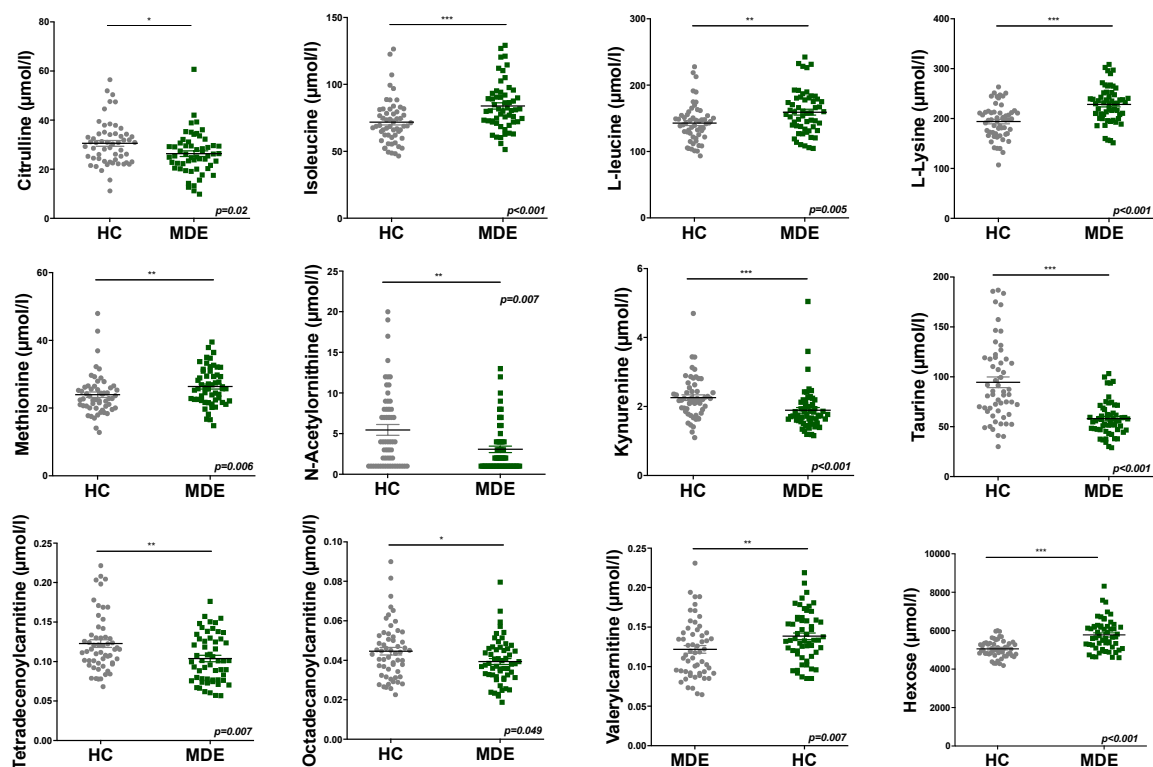

**Supplementary Figure 2.** Absolute plasma concentrations of the significant single metabolites that are different between depressed patients (MDE, n=56) and matched healthy controls (HC, n=56).

Copyright © 2021 The Author(s) or their employer(s).

To receive this resource in an accessible format, please contact us at [cmajgroup@cmaj.ca](mailto:cmajgroup@cmaj.ca).

Online appendices are unedited and posted as supplied by the authors.

### Supplementary Fig 3

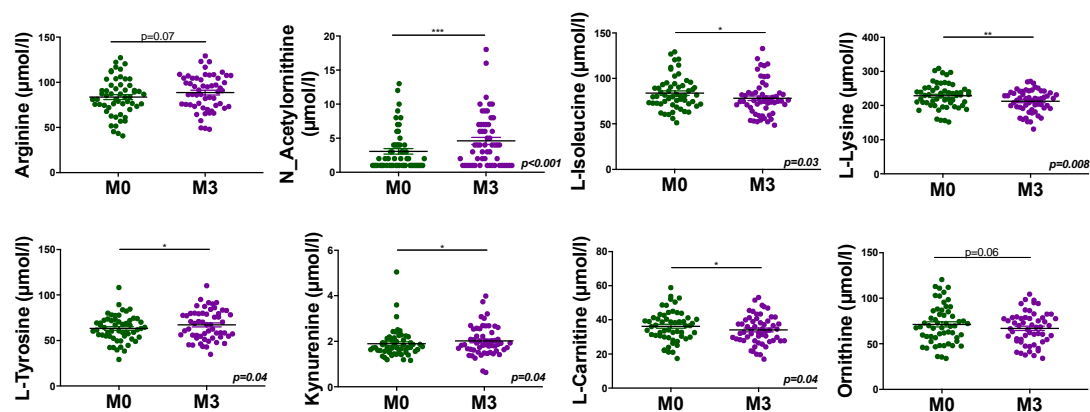

metabolites that are different between patients with a current major depressive episode before ( $n=56$ ) and after ( $n=56$ ) treatment.



Copyright © 2021 The Author(s) or their employer(s).

To receive this resource in an accessible format, please contact us at [cmajgroup@cmaj.ca](mailto:cmajgroup@cmaj.ca).

Online appendices are unedited and posted as supplied by the authors.

### Supplementary fig 5

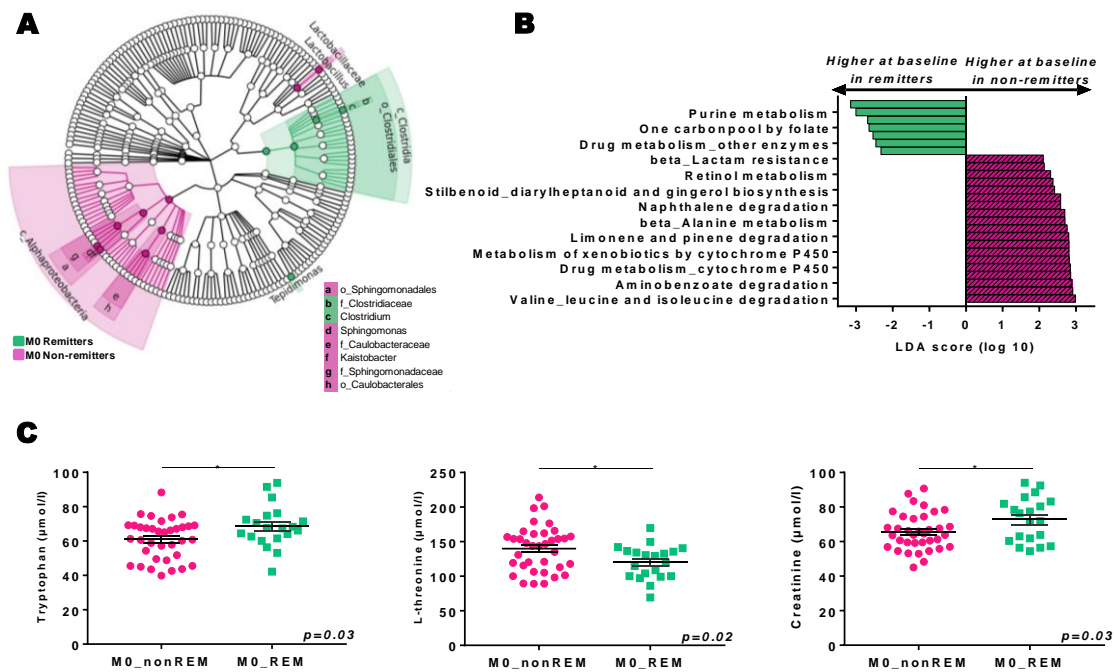

**Supplementary Figure 5. Pre-treatment blood microbiota profile in depressed patients (MDE) who will be remitters after treatment (n=24).** (A) Cladogram showing the taxa with the largest differences in abundance at baseline according to the response to treatment: remitters (green) and non-remitters (pink). From inside to outside, the circles represent the phylum, class, order, family, and genus. Only taxa with a LDA score > 2 and  $p < 0.05$ , determined by the Wilcoxon signed rank test, are shown. (B) LEfSe analysis for the predicted metagenome metabolic pathways (KEGG modules) in the baseline blood microbiota according to the response to treatment remitters (green) vs. non-remitters (pink). Only pathways with a LDA score > 2.0,  $p < 0.05$  determined by the Wilcoxon signed rank test are shown. (C) Absolute plasma concentrations of the significant single metabolites that are different between depressed patients according to remission.
